# Supplementary material
Source: PubMed Central journal article supplement (PMC5369499)
Supplement: flgastro-2016-100685supp_table.pdf [file flgastro-2016-100685supp_table.pdf]

**Supplementary Table 1.** Immunogenicity of maintenance anti-TNF therapy in IBD RCTs.

| <b>RCT</b>                       | <b>Total ADA, %</b> | <b>With IMM, %</b> | <b>Without IMM, %</b> |
|----------------------------------|---------------------|--------------------|-----------------------|
| <b><i>Infliximab</i></b>         |                     |                    |                       |
| [1]                              | 7.3                 | 0.9                | 14.6                  |
| [2]                              | 14                  | 9.7                | 17.2                  |
| [3]                              | 17                  | 9                  | 21.3                  |
| <b><i>Adalimumab</i></b>         |                     |                    |                       |
| [4]                              | 0.4                 | 0                  | 0.4                   |
| [5]                              | 2.6                 | 0                  | 3.8                   |
| [6]                              | 2.9                 | 0                  | 2.9                   |
| <b><i>Certolizumab pegol</i></b> |                     |                    |                       |
| [7]                              | 8                   | 4                  | 10                    |
| [8]                              | 8                   | 2                  | 12                    |
| <b><i>Golimumab</i></b>          |                     |                    |                       |
| [9]                              | 2.9                 | 1.1                | 3.8                   |

TNF: tumor necrosis factor, RCTs: randomized control trials, ADA: anti-drug antibodies, IMM: immunomodulators, IBD: inflammatory bowel disease.

### **Supplementary references**

1. Colombel JF, Sandborn WJ, Reinisch W, et al. Infliximab, azathioprine, or combination therapy for Crohn's disease. *N Engl J Med* 2010;362:1383-95.
2. Hanauer SB, Feagan BG, Lichtenstein GR, et al. Maintenance infliximab for Crohn's disease: the ACCENT I randomised trial. *Lancet* 2002;359:1541-9.
3. Sands BE, Anderson FH, Bernstein CN, et al. Infliximab maintenance therapy for fistulizing Crohn's disease. *N Engl J Med* 2004;350:876-85.

4. Hanauer SB, Sandborn WJ, Rutgeerts P, *et al.* Human anti-tumor necrosis factor monoclonal antibody (adalimumab) in Crohn's disease: the CLASSIC-I trial. *Gastroenterology* 2006;130:323-33.
5. Sandborn WJ, Hanauer SB, Rutgeerts P, *et al.* Adalimumab for maintenance treatment of Crohn's disease: results of the CLASSIC II trial. *Gut* 2007;56:1232-9.
6. Sandborn WJ, van Assche G, Reinisch W, *et al.* Adalimumab induces and maintains clinical remission in patients with moderate-to-severe ulcerative colitis. *Gastroenterology* 2012;142:257-65.
7. Sandborn WJ, Feagan BG, Stoinov S, *et al.* Certolizumab pegol for the treatment of Crohn's disease. *N Engl J Med* 2007;357:228-38.
8. Schreiber S, Khaliq-Kareemi M, Lawrance IC, *et al.* Maintenance therapy with certolizumab pegol for Crohn's disease. *N Engl J Med* 2007;357:239-50.
9. Sandborn WJ, Feagan BG, Marano C, *et al.* Subcutaneous golimumab maintains clinical response in patients with moderate-to-severe ulcerative colitis. *Gastroenterology* 2014;146:96-109.
